# Supplementary material
Source: publisher site journal article supplement (http://content.karger.com/ProdukteDB/miscArchiv/000/103/873/Suppl_Material.pdf)
Supplement: Supplementary file 1 [file Suppl_Material.pdf]

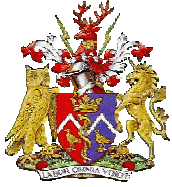

### Voice Prosthesis Questionnaire (version 2)

This questionnaire asks about your current experience with your voice prosthesis and related issues. Please answer all of the questions by circling the response that is closest to your situation.

Name: \_\_\_\_\_ Medical Record No.: \_\_\_\_\_ Date: \_\_\_\_\_  
Age: \_\_\_\_\_ Sex: male / female

1. How long have you been using the voice prosthesis?  
Number of years / months \_\_\_\_\_

2. Which voice prosthesis do you currently use?  
i.) Blom-Singer: Duckbill / Low pressure / Indwelling  
ii) Provox type \_\_\_\_\_  
iii) Other: \_\_\_\_\_

3. Do you use any other form of communication other than your valve?  
1=oesophageal speech 2=electrolarynx 3=mouthing 4= sign language 5=writing 6=no

4. Do you know the length (mm) & diameter (Fr) of your current prosthesis?  
\_\_\_\_\_ mm \_\_\_\_\_ Fr

5. How would you rate your restored voice?

0 1 2 3 4 5 6 7 8 9 10  
Poor Excellent

6. Do people understand you?

In a quiet room 0 1 2 3 4 5 6 7 8 9 10  
Never Always

In a noisy environment 0 1 2 3 4 5 6 7 8 9 10  
Never Always

On the telephone 0 1 2 3 4 5 6 7 8 9 10  
Never Always

7. Is your voice loud enough?

In a quiet room 0 1 2 3 4 5 6 7 8 9 10  
Never Always

In a noisy environment 0 1 2 3 4 5 6 7 8 9 10  
Never Always

On the telephone 0 1 2 3 4 5 6 7 8 9 10  
Never Always

8. How do you rate the tone of your voice?

0 1 2 3 4 5 6 7 8 9 10  
Too low Too high

9. Have you had any leakage relating to your prosthesis in the last 7 days?

1= yes 2= no Last valve change: \_\_\_\_\_ days \_\_\_\_\_ months ago

Device

Speech-related issues

Leakage-related issues

**10. How much of an issue has leakage been in general to you?**

0    1    2    3    4    5    6    7    8    9    10  
 No issue Major issue

**11. What method(s) have you used to control leakage?**

1= nothing    3= plug (indwelling users only)    4= any other \_\_\_\_\_  
 2= antifungal medication (please specify name, frequency, duration & method of use)

**12. How often has the voice prosthesis been changed?**

1= never    2= every \_\_\_\_\_ months/ year

**13. Do you use the same valve more than once after removal & cleaning?**

1= no    2= yes, then how many times? \_\_\_\_\_

**14. Reason(s) for replacement:**

1= leakage *through* prosthesis    3= no voicing    5=other \_\_\_\_\_  
 2= leakage *around* prosthesis    4= effortful voicing

**15. Do you change your own prosthesis?**

1= yes    2= no

**16. How would you describe the removal?**

0    1    2    3    4    5    6    7    8    9    10  
 Very easy Very difficult

If difficult, why? \_\_\_\_\_

**17. How would you describe the insertion?**

0    1    2    3    4    5    6    7    8    9    10  
 Very easy Very difficult

If difficult, why? \_\_\_\_\_

**18. If you have experienced an accidental loss of your voice prosthesis, what caused it?**

1=coughed out    2= swallowed    3= inhaled    4=other \_\_\_\_\_

Maintenance

**19. Is your prosthesis easy to clean?**

1= yes    2= no, please specify why \_\_\_\_\_

**20. How do you clean your voice prosthesis?**

1= brush    2= pipette    3= both    4= any other \_\_\_\_\_

**21. If yes, how many times per day? \_\_\_\_\_**

**22. How much time is spent (approx.) over 24 h, looking after your valve?**

cleaning \_\_\_\_\_ min  
 valve changes \_\_\_\_\_ min  
 stoma care \_\_\_\_\_ min

**23. Are you able to achieve a tight stoma seal when using your voice?**

1= yes    2= no    If not, why? \_\_\_\_\_

**24. How much has the voice restoration influenced your quality of life** (see def. at the end of Questionnaire)?

0 1 2 3 4 5 6 7 8 9 10  
Worsened No change Improved

**25. How much has the voice restoration allowed you to return to your daily activities?**

0 1 2 3 4 5 6 7 8 9 10  
None at all Yes, fully

**26. How do you rate your ability to swallow?**

0 1 2 3 4 5 6 7 8 9 10  
Poor Excellent

**27. Do you have any complaints or suggestions about the voice prosthesis?**

**28. Which humidification system do you currently use?**

None / Provox HME / Blom-Singer / Laryngofoam / Buchanan bib / Other \_\_\_\_\_

**IF YOU DO NOT USE A HUMIDIFICATION SYSTEM, THEN PLEASE GO TO QUESTION 37**

**29. How often do you change your filter/protector?**

Every \_\_\_\_ h

**30. How do you rate your voice with the humidification system?**

0 1 2 3 4 5 6 7 8 9 10  
Poor Excellent

**31. Do people understand you?**

In a quiet room 0 1 2 3 4 5 6 7 8 9 10  
Never Always

In a noisy environment 0 1 2 3 4 5 6 7 8 9 10  
Never Always

On the telephone 0 1 2 3 4 5 6 7 8 9 10  
Never Always

**32. Is your voice loud enough?**

In a quiet room 0 1 2 3 4 5 6 7 8 9 10  
Never Always

In a noisy environment 0 1 2 3 4 5 6 7 8 9 10  
Never Always

On the telephone 0 1 2 3 4 5 6 7 8 9 10  
Never Always

**33. How do you rate the tone of your voice?**

0 1 2 3 4 5 6 7 8 9 10  
Too low Too high

QoL

Humidification issues

**34. How much has the humidification system influenced your quality of life?**

0 1 2 3 4 5 6 7 8 9 10  
Worsened No change Improved

**35. Have you noticed a reduction in the amount of mucus produced since using a humidification system?**

0 1 2 3 4 5 6 7 8 9 10  
None A lot

**36. Do you have any complaints or suggestions about the humidification system?**

**37. Which hands-free system do you use for voicing?**

None / Blom-Singer ATV / ATV11 / Provox Free-hands / Other \_\_\_\_\_

**IF YOU DO NOT USE A HANDS-FREE SYSTEM, PLEASE GO TO QUESTION 45**

**38. How do you rate your voice with a hands-free system?**

0 1 2 3 4 5 6 7 8 9 10  
Poor Excellent

**39. Do people understand you?**

In a quiet room 0 1 2 3 4 5 6 7 8 9 10  
Never Always

In a noisy environment 0 1 2 3 4 5 6 7 8 9 10  
Never Always

On the telephone 0 1 2 3 4 5 6 7 8 9 10  
Never Always

**40. Is your voice loud enough?**

In a quiet room 0 1 2 3 4 5 6 7 8 9 10  
Never Always

In a noisy environment 0 1 2 3 4 5 6 7 8 9 10  
Never Always

On the telephone 0 1 2 3 4 5 6 7 8 9 10  
Never Always

**41. How do you rate the tone of your voice?**

0 1 2 3 4 5 6 7 8 9 10  
Too low Too high

**42. Has the hands-free system influenced your quality of life?**

0 1 2 3 4 5 6 7 8 9 10  
Worsened No change Improved

Hands-free issues
